# Supplementary material
Source: PubMed Central journal article supplement (PMC3142309)

## Supporting information

# Benzyl Derivatives with in Vitro Binding Affinity for Human Opioid Receptors and Cannabinoid Receptors from the Fungus *Eurotium repens*

Jiangtao Gao,<sup>†</sup> Francisco León,<sup>†</sup> Mohamed M. Radwan,<sup>‡</sup> Olivia R. Dale,<sup>†</sup> Corey A. Gemelli,<sup>†</sup> Susan P. Manley,<sup>‡</sup> Shari Lupien,<sup>§</sup> Xiaoning Wang,<sup>†</sup> Robert A. Hill,<sup>⊥</sup> Frank M. Dugan,<sup>§</sup> Horace G. Cutler,<sup>||</sup> Stephen J. Cutler<sup>1,†,‡</sup>

*Department of Medicinal Chemistry and National Center for Natural Products Research, School of Pharmacy, The University of Mississippi, University, MS 38677, Natural Products Discovery Group, College of Pharmacy and Health Sciences, Mercer University, Atlanta, Georgia, 30341, USDA-ARS Western Regional Plant Introduction Station, Washington State University, Pullman, WA 99164, USA, and National Centre for Advanced Bio-Protection Technologies, Lincoln University, Lincoln 7647, New Zealand*

---

<sup>1</sup> To whom correspondence should be addressed. Tel: (1)-662-9157101.

Fax: (1)-662-5638. E-mail: [cutler@olemiss.edu](mailto:cutler@olemiss.edu).

<sup>†</sup> Medicinal Chemistry Department, University of Mississippi

<sup>‡</sup> Natural Products Research, University of Mississippi

<sup>§</sup> Washington State University

<sup>⊥</sup> Lincoln University.

<sup>||</sup> Mercer University.

## Table of contents

|                                                                                                                |     |
|----------------------------------------------------------------------------------------------------------------|-----|
| <b>Figure 1.</b> $^1\text{H}$ NMR Spectrum of Repenol A ( <b>1</b> ) in $\text{CDCl}_3-d_3$ (500 MHz).....     | S3  |
| <b>Figure 2.</b> $^{13}\text{C}$ NMR Spectrum of Repenol A ( <b>1</b> ) in $\text{CDCl}_3-d_3$ (125 MHz).....  | S4  |
| <b>Figure 3.</b> DEPT 135° Spectrum of Repenol A ( <b>1</b> ) in $\text{CDCl}_3-d_3$ (125 MHz).....            | S5  |
| <b>Figure 4.</b> HMQC Spectrum of Repenol A ( <b>1</b> ) in $\text{CDCl}_3-d_3$ (500 MHz).....                 | S6  |
| <b>Figure 5.</b> HMBC Spectrum of Repenol A ( <b>1</b> ) in $\text{CDCl}_3-d_3$ (500 MHz).....                 | S7  |
| <b>Figure 6.</b> COSY Spectrum of Repenol A ( <b>1</b> ) in $\text{CDCl}_3-d_3$ (500 MHz).....                 | S8  |
| <b>Figure 7.</b> $^1\text{H}$ -NMR Spectrum of Repenol B ( <b>2</b> ) in $\text{CDCl}_3-d_3$ (500 MHz).....    | S9  |
| <b>Figure 8.</b> $^{13}\text{C}$ -NMR Spectrum of Repenol B ( <b>2</b> ) in $\text{CDCl}_3-d_3$ (125 MHz)..... | S10 |
| <b>Figure 9.</b> DEPT 135° Spectrum of Repenol B ( <b>2</b> ) in $\text{CDCl}_3-d_3$ (125 MHz).....            | S11 |
| <b>Figure 10.</b> HMQC Spectrum of Repenol B ( <b>2</b> ) in $\text{CDCl}_3-d_3$ (500 MHz).....                | S12 |
| <b>Figure 11.</b> COSY Spectrum of Repenol B ( <b>2</b> ) in $\text{CDCl}_3-d_3$ (500 MHz).....                | S13 |
| <b>Figure 12.</b> HMBC Spectrum of Repenol B ( <b>2</b> ) in $\text{CDCl}_3-d_3$ (500 MHz).....                | S14 |
| <b>Figure 13.</b> High resolution ESI-MS result of Repenol A ( <b>1</b> ) .....                                | S15 |
| <b>Figure 14.</b> High resolution ESI-MS result of Repenol B ( <b>2</b> ).....                                 | S16 |

**Figure 1.**  $^1\text{H}$  NMR Spectrum of Repenol A (**1**) in  $\text{CDCl}_3-d_3$  (500 MHz).

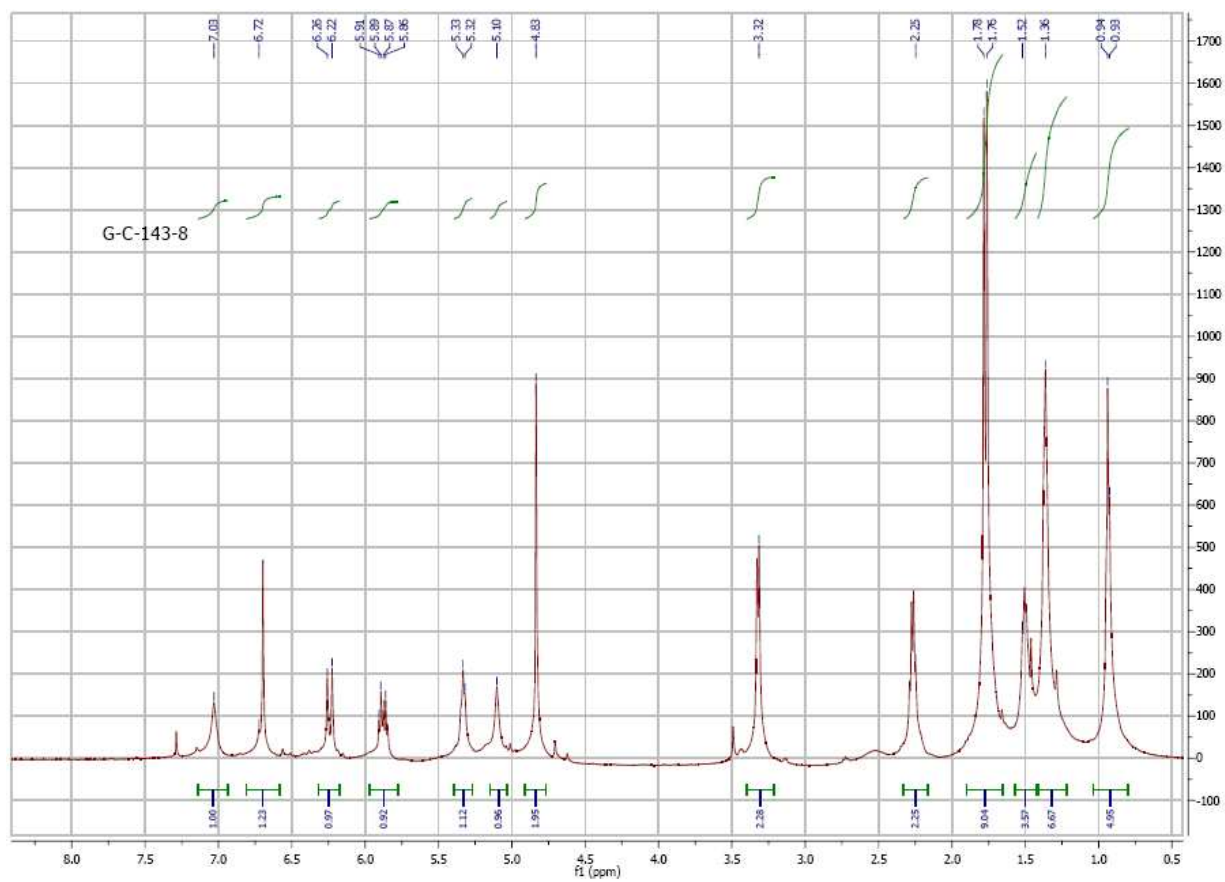

**Figure 2.**  $^{13}\text{C}$  NMR Spectrum of Repenol A (1) in  $\text{CDCl}_3-d_3$  (125 MHz).

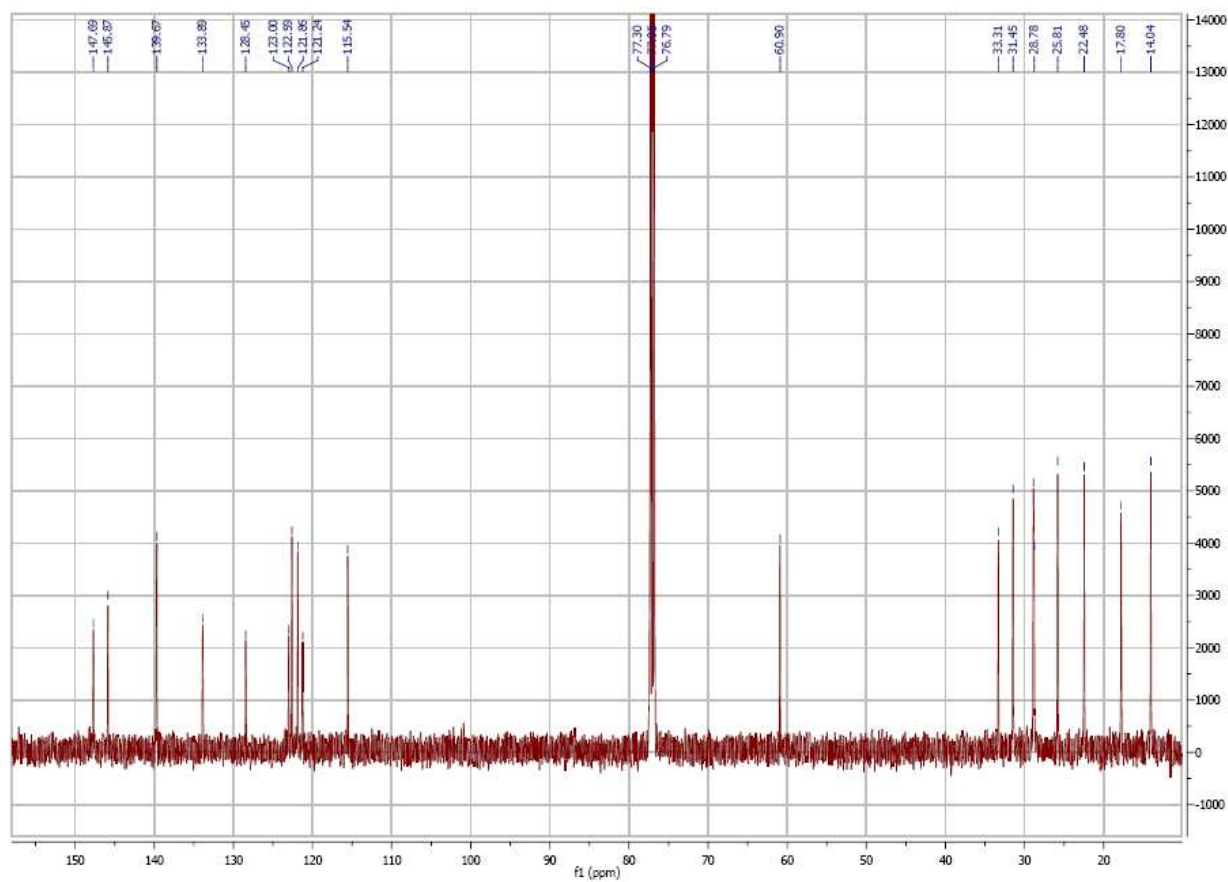

**Figure 3.** DEPT 135° Spectrum of Repenol A (**1**) in  $\text{CDCl}_3-d_3$  (125 MHz).

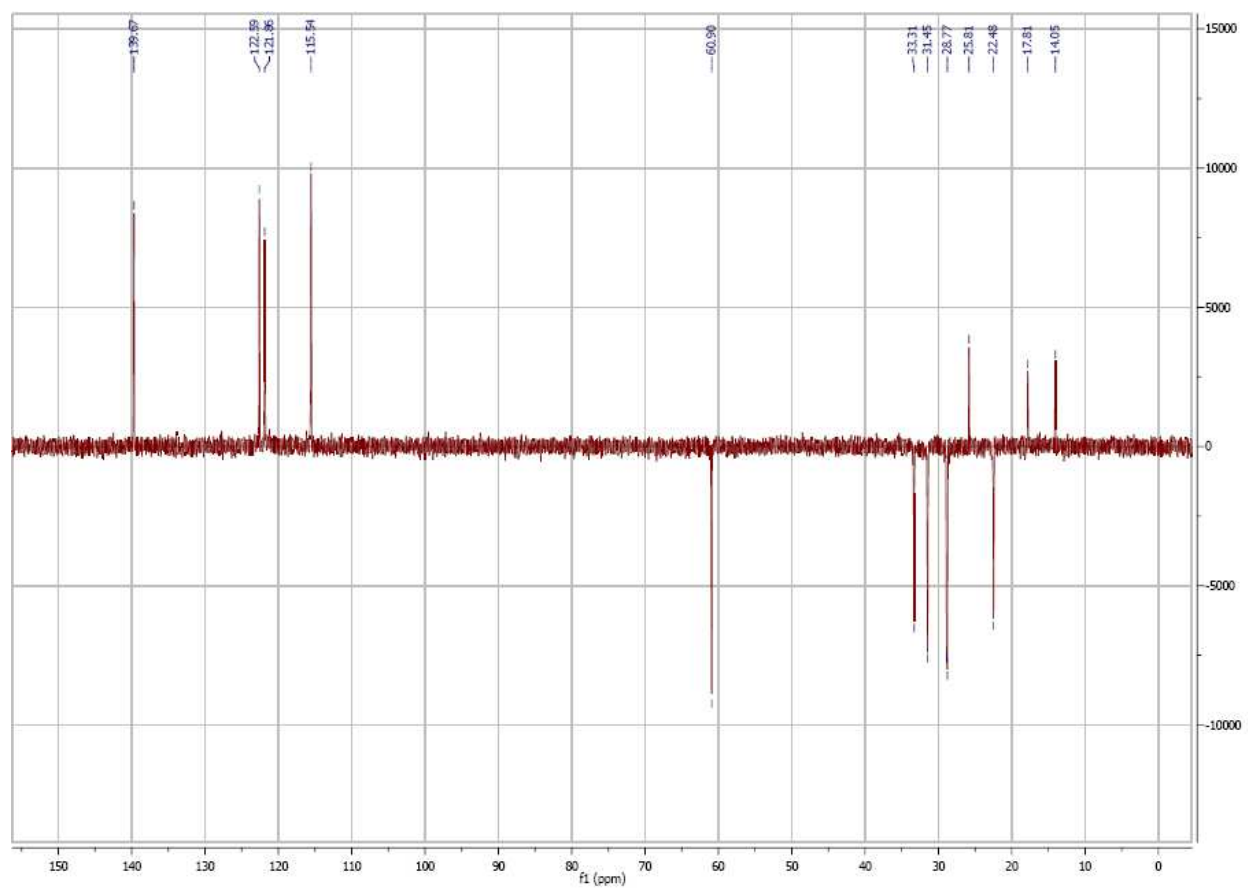

**Figure 4.** HMQC Spectrum of Repenol A (**1**) in CDCl<sub>3</sub>-d<sub>3</sub> (500 MHz).

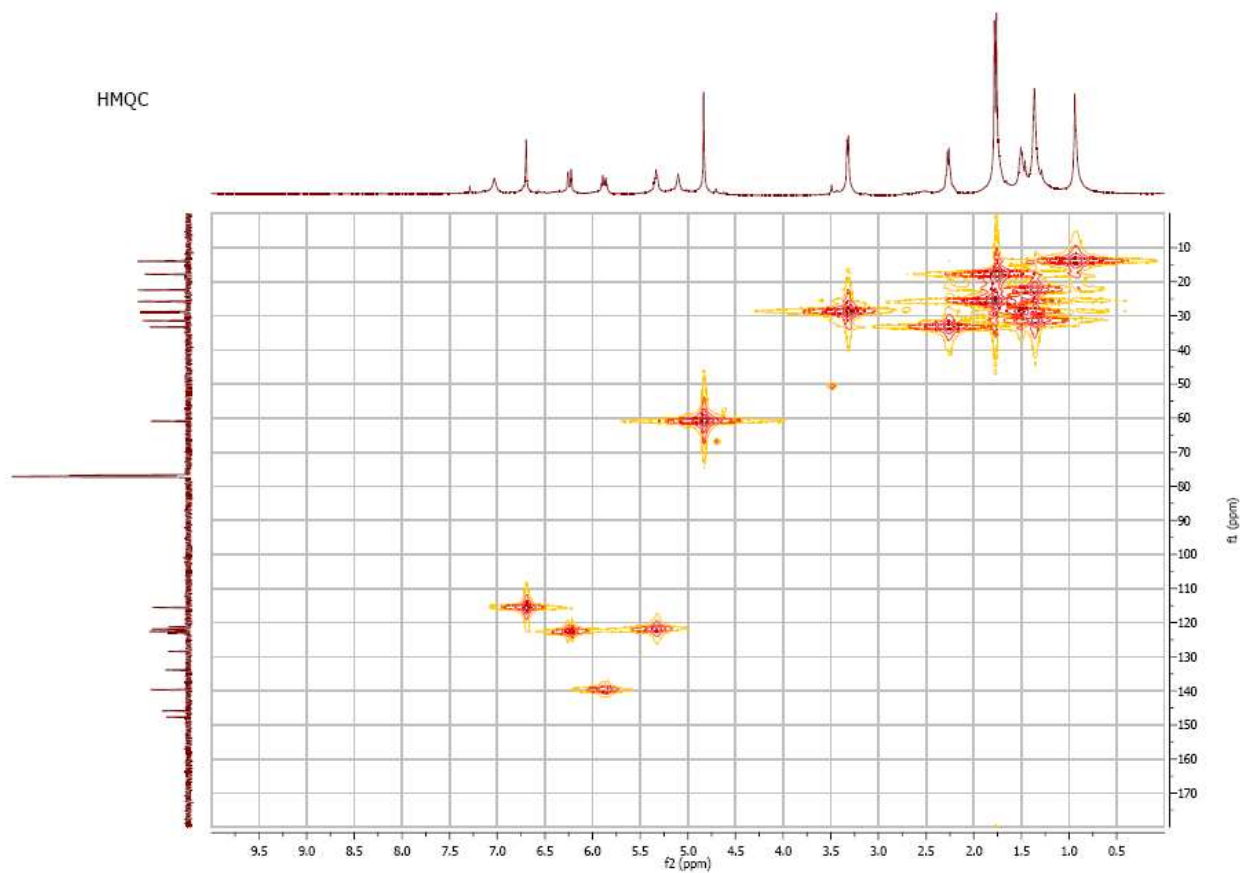

**Figure 5.** HMBC Spectrum of Repenol A (**1**) in  $\text{CDCl}_3-d_3$  (500 MHz).

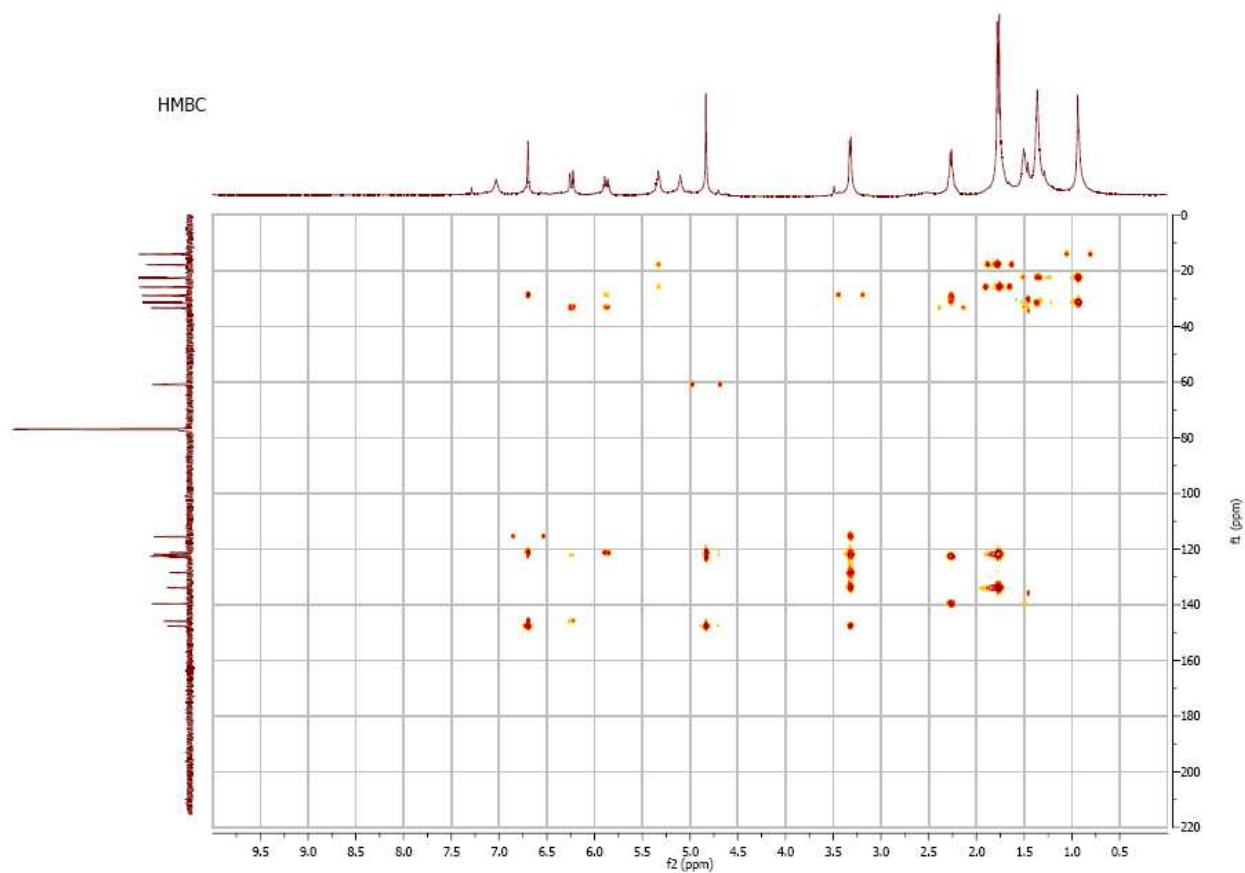

**Figure 6.** COSY Spectrum of Repenol A (**1**) in  $\text{CDCl}_3-d_3$  (500 MHz).

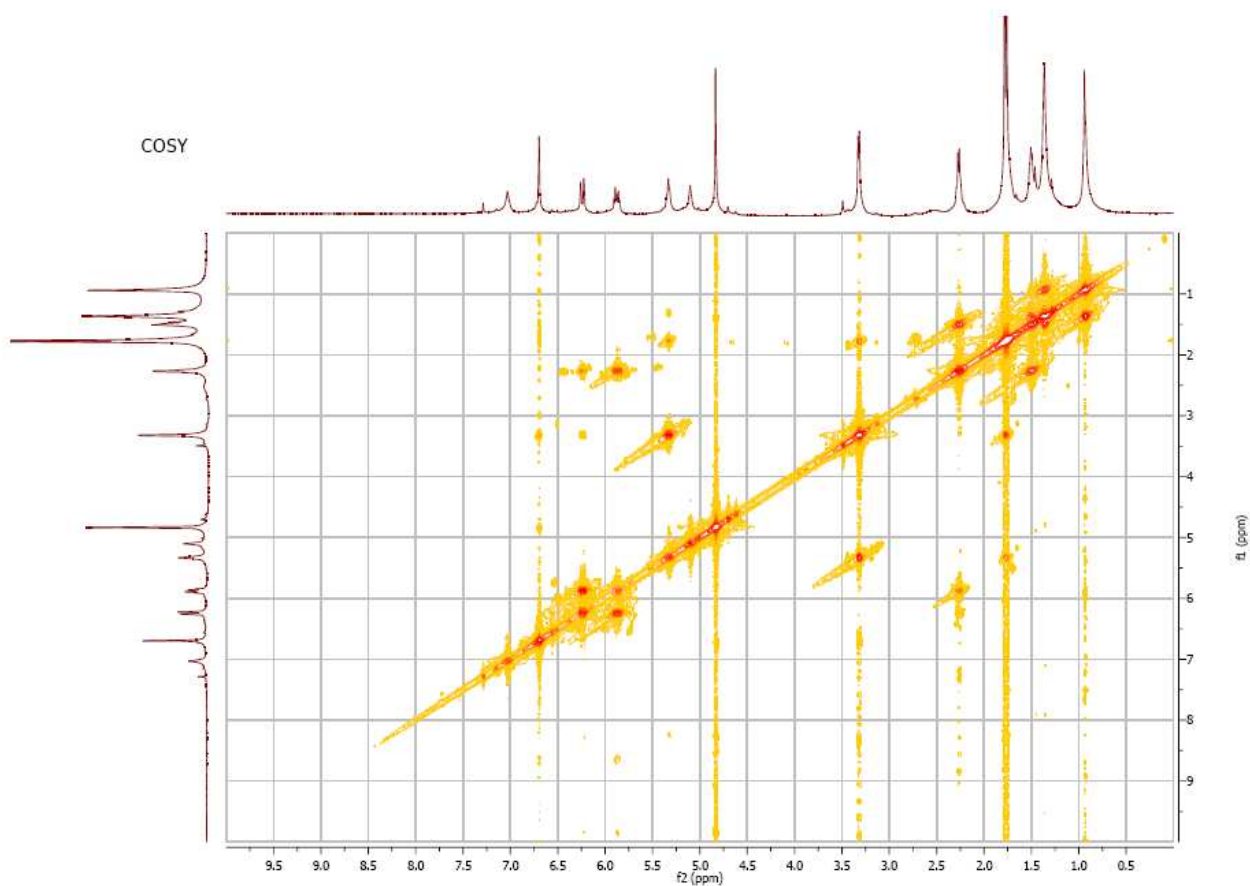



**Figure 7.**  $^1\text{H-NMR}$  Spectrum of Repenol B (**2**) in  $\text{CDCl}_3-d_3$  (500 MHz).

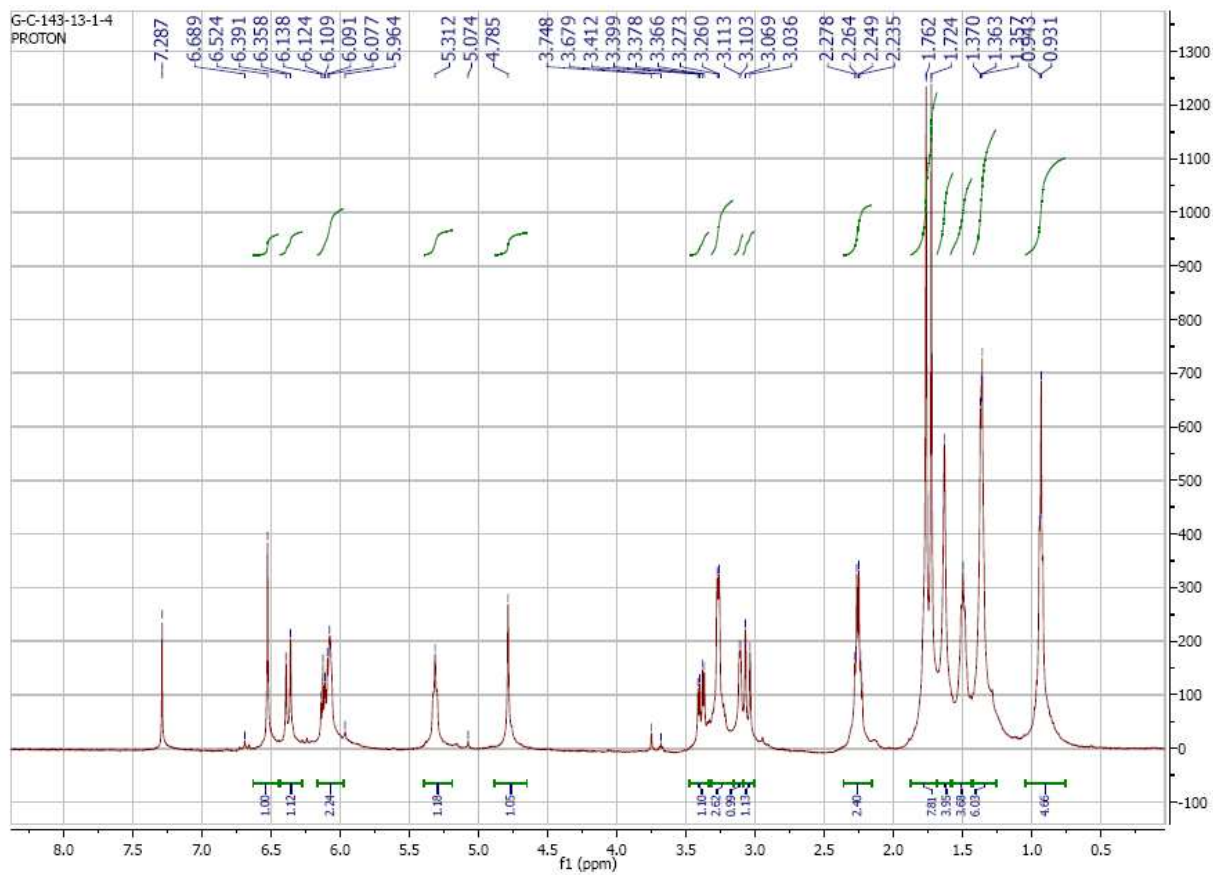

**Figure 8.**  $^{13}\text{C}$ -NMR Spectrum of Repeol B (**2**) in  $\text{CDCl}_3-d_3$  (125 MHz).

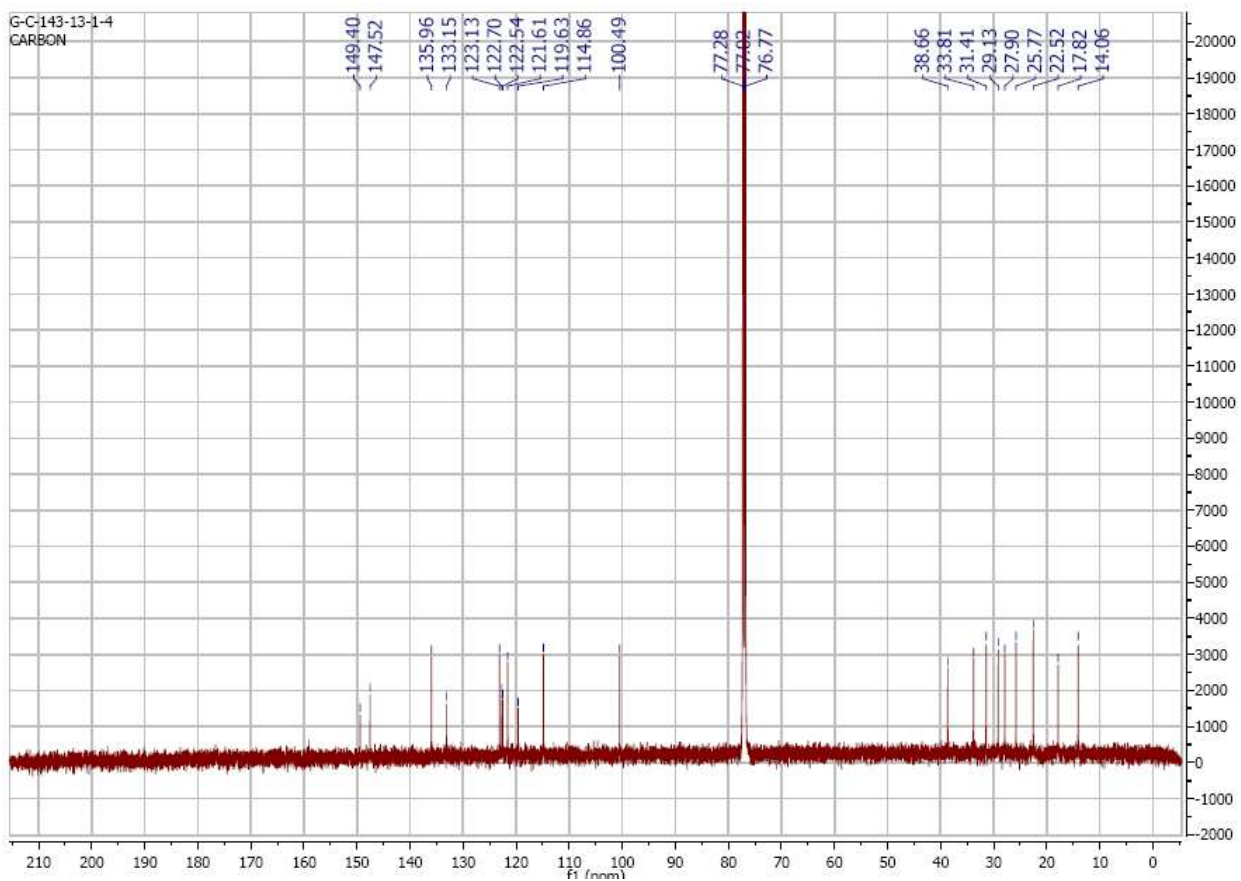

**Figure 9.** DEPT 135° Spectrum of Repeol B (2) in CDCl<sub>3</sub>-d<sub>3</sub> (125 MHz).

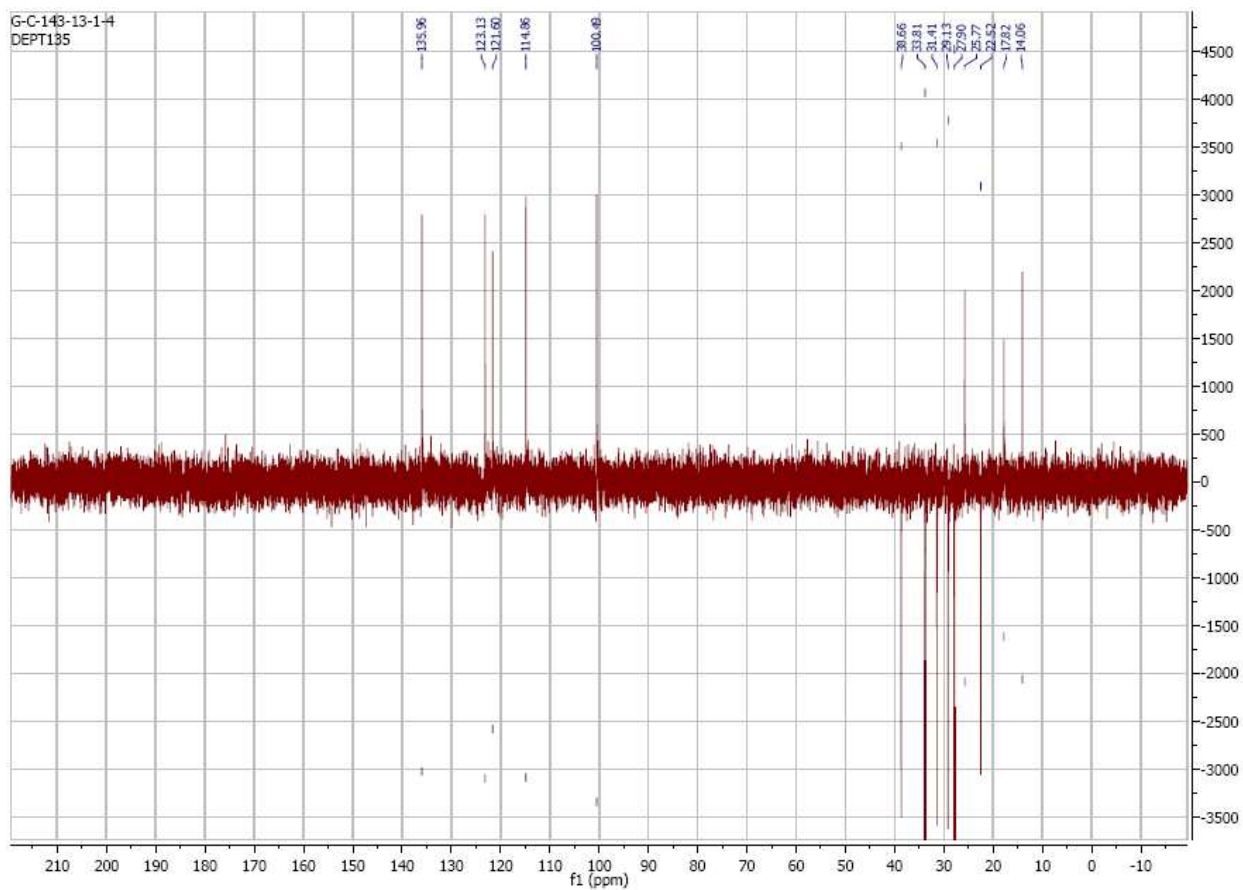

**Figure 10.** HMQC Spectrum of Repenol B (**2**) in  $\text{CDCl}_3-d_3$  (500 MHz).

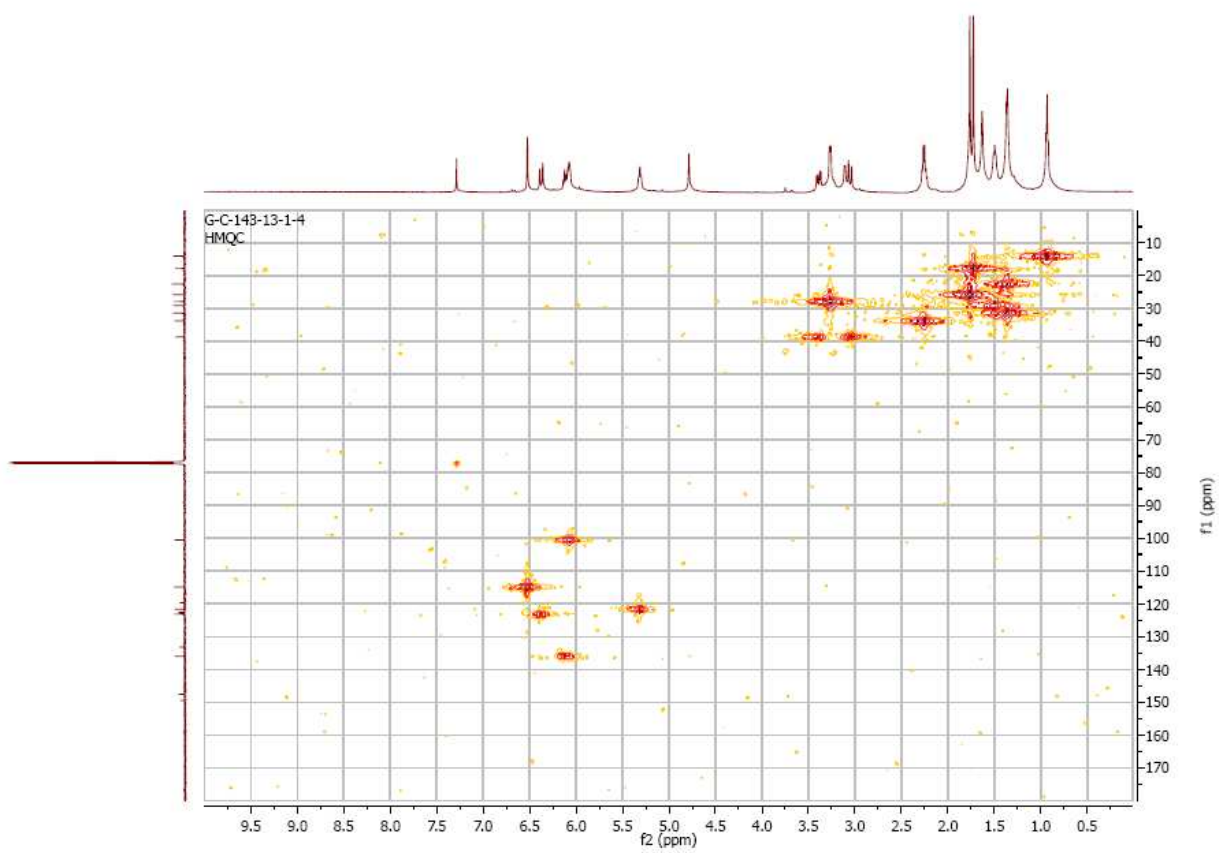

**Figure 11.** COSY Spectrum of Repenol B (**2**) in  $\text{CDCl}_3-d_3$  (500 MHz).

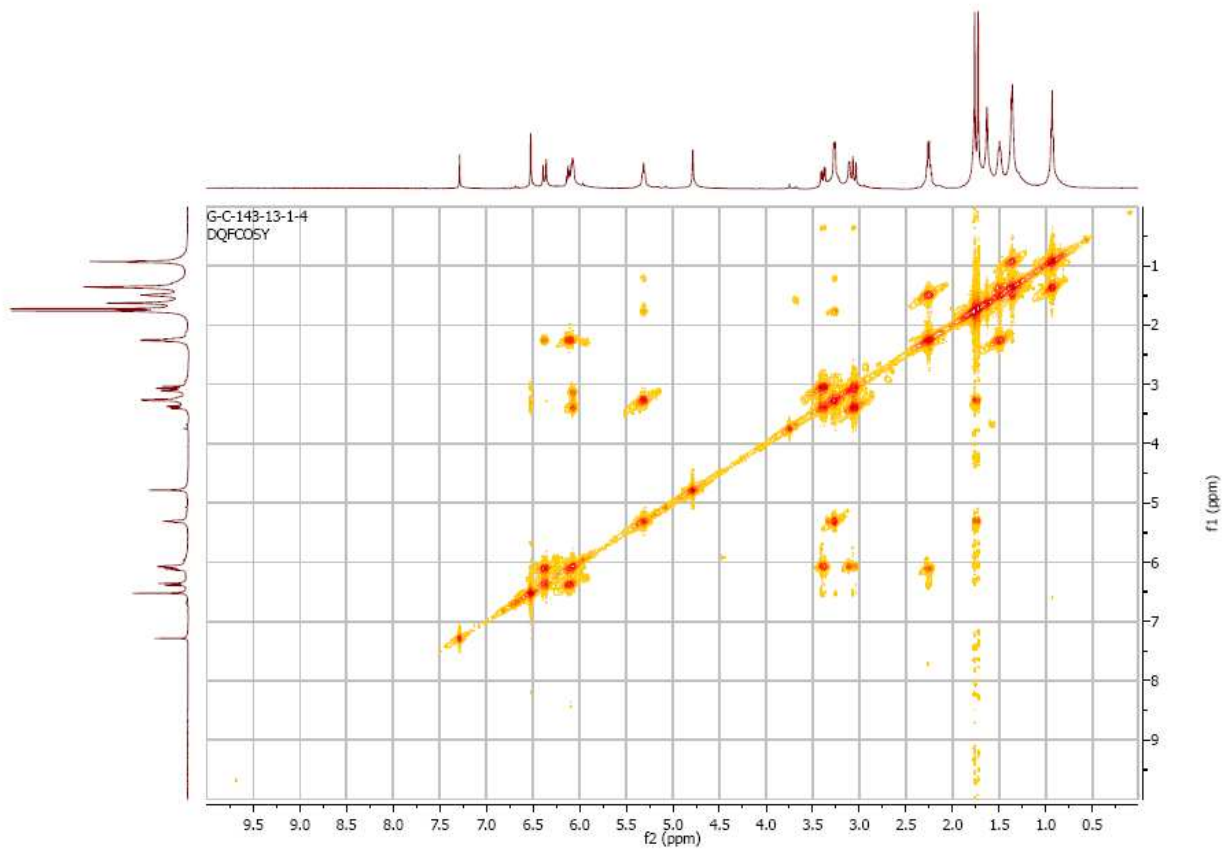

**Figure 12.** HMBC Spectrum of Repenol B (**2**) in CDCl<sub>3</sub>-d<sub>3</sub> (500 MHz).

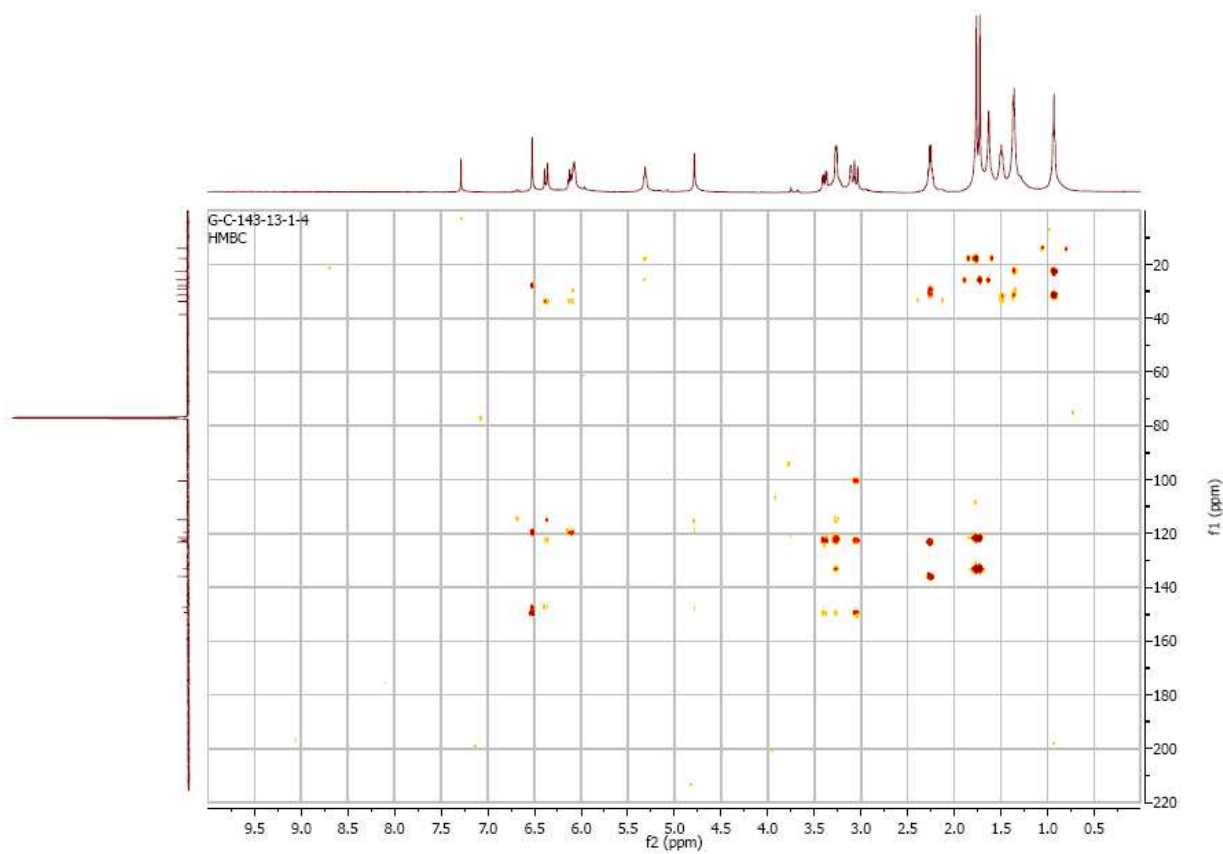

**Figure 13.** High resolution ESI-MS result of Repeol A (1) .

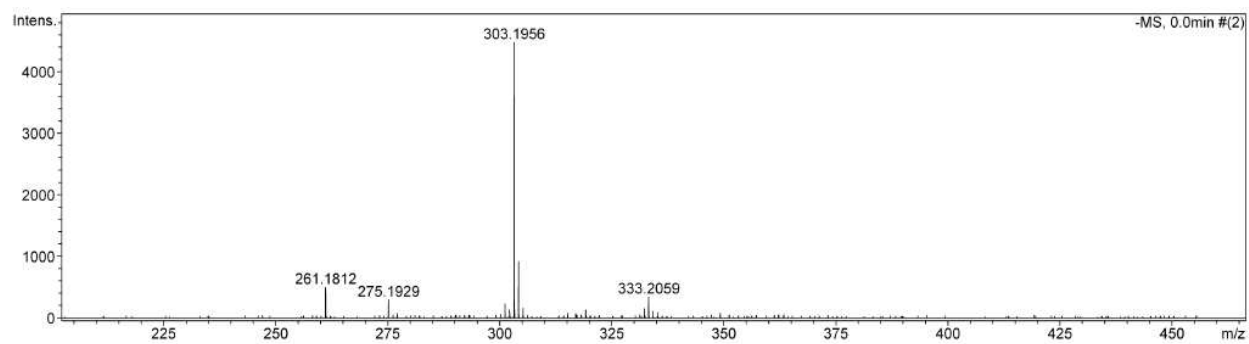

**Figure 14.** High resolution ESI-MS result of Repeol B (2).

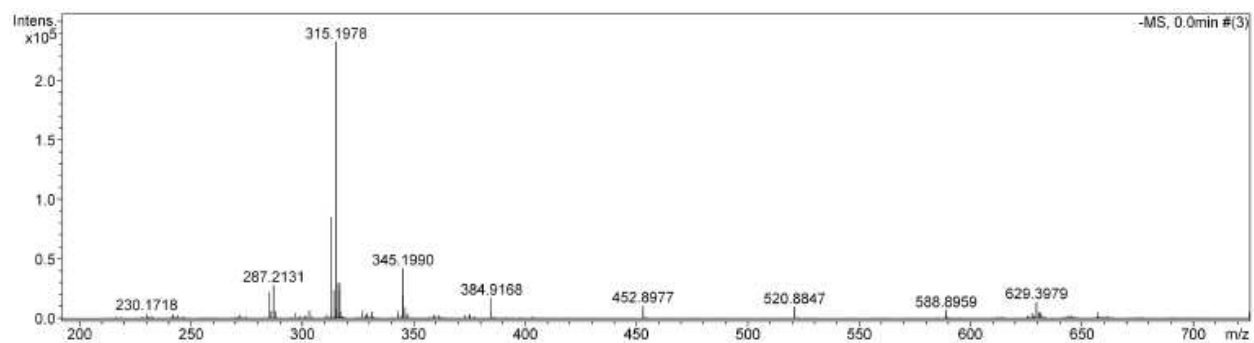

Supplement: NIHMS303788-supplement-1_si_001.pdf [file NIHMS303788-supplement-1_si_001.pdf]
